# Supplementary material for: Numerous Clones Resistant to Phytophthora palmivora in the “Guiana” Genetic Group of Theobroma cacao L
Source: PLoS One. 2012 Jul 26;7(7):e40915. doi: 10.1371/journal.pone.0040915 (PMC3406055; doi:10.1371/journal.pone.0040915)
Supplement: Table S2 — Pearson coefficient of correlation between series of inoculations with P. palmivora and between each series and the general mean. (XLS) [file pone.0040915.s002.xls]

## Sheet: Feuil1
Table S2. Pearson coeffcient of correlation between series of inoculations with P. palmivora and between each series and the general mean
	Series 1	Series 2	Series 3	Series 4	Series 5	Series 6	Series 7	Series 8	Series 9	Series 10	Mean
Series 1	1.00000	0.22812	0.06678	0.11490	0.04261	0.06892	0.16523	0.09920	0.14133	0.14102	0.44957	(1)
		0.0025	0.4105	0.1214	0.6171	0.3805	0.0334	0.1902	0.0592	0.0666	<.0001	(2)
	184	173	154	183	140	164	166	176	179	170	184	(3)
Series 2	0.22812	1.00000	0.11175	0.25003	0.11693	0.16005	0.16731	0.21943	0.16730	0.27267	0.52713	(1)
	0.0025		0.1690	0.0007	0.1673	0.0394	0.0333	0.0038	0.0269	0.0003	<.0001	(2)
	173	180	153	179	141	166	162	172	175	168	180	(3)
Series 3	0.06678	0.11175	1.00000	0.13254	0.08408	0.23361	0.30404	0.10341	0.06616	0.10696	0.46099	(1)
	0.4105	0.1690		0.0969	0.3492	0.0041	0.0002	0.2033	0.4150	0.1912	<.0001	(2)
	154	153	159	158	126	149	146	153	154	151	159	(3)
Series 4	0.11490	0.25003	0.13254	1.00000	0.20159	0.08928	0.09951	0.18595	0.15121	0.12355	0.50030	(1)
	0.1214	0.0007	0.0969		0.0158	0.2484	0.1953	0.0120	0.0399	0.1023	<.0001	(2)
	183	179	158	190	143	169	171	182	185	176	190	(3)
Series 5	0.04261	0.11693	0.08408	0.20159	1.00000	0.09433	0.20330	0.22328	0.12757	0.02658	0.41509	(1)
	0.6171	0.1673	0.3492	0.0158		0.2765	0.0189	0.0085	0.1331	0.7578	<.0001	(2)
	140	141	126	143	144	135	133	138	140	137	144	(3)
Series 6	0.06892	0.16005	0.23361	0.08928	0.09433	1.00000	0.19848	0.15765	0.15681	0.05175	0.42628	(1)
	0.3805	0.0394	0.0041	0.2484	0.2765		0.0136	0.0451	0.0443	0.5157	<.0001	(2)
	164	166	149	169	135	170	154	162	165	160	170	(3)
Series 7	0.16523	0.16731	0.30404	0.09951	0.20330	0.19848	1.00000	0.34029	0.25561	0.29402	0.59250	(1)
	0.0334	0.0333	0.0002	0.1953	0.0189	0.0136		<.0001	0.0009	0.0002	<.0001	(2)
	166	162	146	171	133	154	172	166	167	160	172	(3)
Series 8	0.09920	0.21943	0.10341	0.18595	0.22328	0.15765	0.34029	1.00000	0.20768	0.24298	0.52107	(1)
	0.1902	0.0038	0.2033	0.0120	0.0085	0.0451	<.0001		0.0054	0.0014	<.0001	(2)
	176	172	153	182	138	162	166	183	178	170	183	(3)
Series 9	0.14133	0.16730	0.06616	0.15121	0.12757	0.15681	0.25561	0.20768	1.00000	0.36169	0.54065	(1)
	0.0592	0.0269	0.4150	0.0399	0.1331	0.0443	0.0009	0.0054		<.0001	<.0001	(2)
	179	175	154	185	140	165	167	178	186	174	186	(3)
Series 10	0.14102	0.27267	0.10696	0.12355	0.02658	0.05175	0.29402	0.24298	0.36169	1.00000	0.56188	(1)
	0.0666	0.0003	0.1912	0.1023	0.7578	0.5157	0.0002	0.0014	<.0001		<.0001	(2)
	170	168	151	176	137	160	160	170	174	177	177	(3)
Mean	0.44957	0.52713	0.46099	0.50030	0.41509	0.42628	0.59250	0.52107	0.54065	0.56188	1.00000	(1)
	<.0001	<.0001	<.0001	<.0001	<.0001	<.0001	<.0001	<.0001	<.0001	<.0001		(2)
	184	180	159	190	144	170	172	183	186	177	191	(3)
(1) Pearson coeeficient of correlation
(2) Probability >│r│with H0: Rho=0
(3) Number of clones in common between series
